# Supplementary material for: HOXA-AS2 promotes type I endometrial carcinoma via miRNA-302c-3p-mediated regulation of ZFX
Source: PubMed Central journal article supplement (PMC7393821; doi:10.1186/s12935-020-01443-0), 2020-07-31

**a**

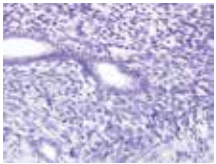

normal

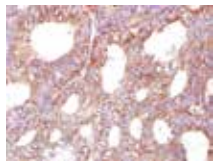

cancer

**b**

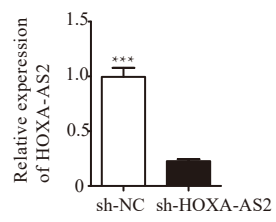

Supplement: 12935_2020_1443_MOESM3_ESM.pdf [file 12935_2020_1443_MOESM3_ESM.pdf]
